# Supplementary material
Source: PubMed Central journal article supplement (PMC7929150)
Supplement: bjs_11833_supp.pdf [file bjs_11833_supp.pdf]

## Contributors

### S-COVID Collaborative Group: (Name Surname).

A Kefleyesus; A.G.M. Hoofwijk; Abdullah Sami Eldaly; Abel Gonzalez; Adraoui Jawad; Ahmad Jooma; Ahmed Mousa Hafez; Ainhoa Valle Rubio; Aitor Landaluze-Olavarria; Aiwen Wu; Akihisa Nagatsu; Akira Inoue; Akira Kanamoto; Akira Ouchi; Alaa El-Hussuna; Alba Vazquez-Melero; Albert M. Wolthuis; Alberto M. Peral; Alejandra Cruz Lozano; Aleksandr Efremov; Aleksandr V. Rysantsev; Alessandra Di Giorgio; Alessandro Parente; Alessandro Tamburrini; Alessio Alò; Alexander Forero-Torres; Alexander L. Vahrmeijer; Alexander Varabei; Siles Hinojosa; Ali Zeynel Abidin Balkan; Alice Frontali; Alikin Oleg; Álvaro Soler-Silva; Amin Makni; Ana André; Ana María García Cabrera; Ana María Gonzalez Fernández; Ana M. Minaya-Bravo; Ana Rodríguez-Sánchez; Ana-Maria Musina; Anang Pangeni; Anastasia Zolotko; Andranik Tonoyan; Andrea Balla; Andrea Belli; Andrea Cavallaro; Andrea Chierici; Andrea Divizia; Andrea Fares Bucci; Andrea Jiménez Salido; Andrea Morini; Andrea Muratore; Andrea Vignali; Andrei Chitul; Diaconescu Andrei Sebastian; Andrejs Pcolkins; Andrey Shchegolev; Andrew Hollenbeck; Andrew Wisneski; Angelo Iossa; Anna D'Amore; Anndrew Hunter; Anthony J. Hesketh; Andrea La Brocca; Antonino Spinelli; Antonio Caires; Antonio D'Alessandro; Antonio Francisco Sanchís López Correio; Antonio Macri; Antonio Navarro-Sánchez; Apollo Pronk; Aram Akunc; Arash Mehri; Arie Pelta; Aristeidis Papadopoulos; Aristotelis Kechagias; Arshad Rashid; Artur Ramazanov; Ashfaq Chandio; Atsushi Kohyama; Atsushi Nishimura; Atsushi Ohkawa; Audrius Dulskas; Aun Jamal; Aurora Mariani; Ayse Gizem Unal; Ayse Karagoz; Bahar Busra Ozkan; Barham Salih; Baris Gülcü; Beatrice Pessia; Beatriz Martin-Perez; Benedetto Ielpo; Berenice Tulelli; Bin Yang; Boumadani Mhamed; Brenda Murphy; Brunella Maria Pirozzi; Bruno Sensi; Bs Langenhoff; Bulent Belevi; Burak Güney; Caecilia Ng; Camilo

Rueda; Campbell S Roxburgh; Carlo V. Feo; Carlo Ferrari; Carlo Gazia; Carlo Pratesi; Carlo Ratto; Carlos Cerdán Santacruz; Carlos Rodolfo Martinez Arroyave, Carlos Macias; Carlota Garcia Fernandez; Carmen Cagigas Fernandez; Carolina Curtis-Martinez; Caroline Fortmann; Caroline Kim; Catalina Uribe Galeano; Catarina Barroso; Caterina Baldi; Caterina Foppa; Cesare Formisano; Changzai Li; Chao Ding; Chenyu Wang; Chiara Iacusso; Chongwei Yang; Christian Pizzera; Christoph Skias; Christos Chouliaras; Christos Liakos; Chu Matsuda; Chun-yi Wu; Cihangir Ozaslan; Cinzia Tanda; Cipolat Mis Tommaso; Claire Dagorno; Claudia Patricia Arellano Ramos; Claudio Arcudi; Claudio Coco; Cleotilde Mateo Morales; Mujahid Zulfiqar Ali; Constança Teresa Miranda De Azevedo; Coral Cózar Lozano; Corrado Sala; Cosimo Alex Leo; Cosimo Riccardo Scarpa; Cristian Varela Ferro; Cristina Mosquera Fernandez; D Morales-García; Daisuke Nakano; Daniel Cristian; Daniel Hechtel; Daniel Triguero Cánovas; Daniela Calabrese; Daniela Rega; Daniele Ferraro; Daniele Morezzi; Daniele Sommacale; Danielle Brogden; Danilo Miskovic; David Merlini; Davide Pertile; Denise Coniglio; Dexiang Zhu; Dianwen Wu; Diego Coletta; Diego Ramos Rubio; Diego Sasia; Dmitry Phillipov; Domenico Russiello; Dragomir Dardanov; E.C.J. Consten; Edgaras Smolskas; Edoardo Maria Muttillio; Edward Jones; Eiji Sunami; El-Helou Etienne; Elena Chalkiadaki; Elena Giacomelli; Elena Karbovnichaya; Elena Ruiz-Úcar; Eleonora Guaitoli; Elgun Samadov; Elio Jovine; Elio Treppiedi; Elisa Maria Vaterlini; Elisa Zambaiti; Elisabetta Moggia; Elmi Coetzee; Emanuele Chisari; Emanuele D'Errico; Emilia Ciofic; Emilio Peña; Emine Kurt; Emre Balık; Emre Gunay; Emre Sivriköz; Enrico Andolfi; Enrico Araimo; Enrico Lucci; Enrico Opocher; Enrico Pinotti; Enrico Rubino; Enver Reyhan; Erica Mazzotta; Ernesto Barzola Navarro; Etienne El-Helou; Eugenio Licardie-Bolaños; Eva Iglesias Porto; Evelyn Contreras; Evert-Jan Boerma; Fabio Cianchi; Fabio Marino; Fabio Uggeri;

Fanghai Han; Federica Calculli; Federica Falaschi; Federico Ghignone; Federico Perrone; Felice Borghi; Felipe García; Ferdinando Agresta; Ferdinando Carlo Maria Cananzi; Fernando Mendoza-Moreno; Fevzi Cengiz; Filipe Macedo Almeida; Filippo Baracchi; Filippo Carannante; Filippo La Torre; Flavio Fernandes; Florian Friedmacher; Florin Grama; Francesca Carissimi; Francesca Pecchini; Francesco Bianco; Francesco Colombo; Francesco Ferrara; Francesco Litta; Francesco Maria Carrano; Francesco Martignoni; Francesco Menegon Tasselli; Francesco Milone; Francesco Pata; Francesco Sammartino; Francesco Zambianchi; Francisco Barragan; Francisco Herrero; Francisco Schlottmann; Frank C. Den Boer; Frank Pfeffer; Fumihiko Fujita; G Navarra; Gabriel Herrera-Almario; Gabriele Pozzo; Gabriella Teresa Capolupo; Gabrielle H Van Ramshorst; Gadiel Liscia; Gaetano Gallo; Ganesh Asawa; Gaoxiang Wang; Gaurang Raiyani; Geerard Beets; Gemma Sugrañes Naval; Genfeng Jin; George J Chang; George Saakian; Gerardo Kahane; Giacomo Borroni; Giacomo Lo Secco; Gian Luca Baiocchi; Gianluca Baronio; Gianluca Pagano; Gianmaria Casoni Pattacini; Giorgio Lisi; Giovanni Milito; Giovanni Sinibaldi; Giuditta Serrao; Giulia Bagagli; Giuliano Sarro; Giuseppe Brisinda; Giuseppe Candilio; Giuseppe Mangiameli; Giuseppe Giuliani; Gonzalo Pablo Martin-Martin; Gordon Bodzin; Graat Leon; Graham Mackay; Granila Vasil; Graziano Palmisano; Grella Maria Giovanna; Guadalupe Campos Fernández; Guillermo Berrones Steingel; Guoyun Zhang; Gyu Seog Choi; Haipeng Chen; Hajime Hirose; Hajime Kayano; Hanife Seyda Ulgur; Harmony Impellizzeri; Hasani Ariola; Heli Liu; Heriberto Medina; Hideaki Miyauchi; Hidekazu Takahashi; Hideki Hayashi; Hideki Ishikawa; Hideyuki Ishida; Hilbert De Vries; Hilmican Ulman; Hirofumi Kon; Hirofumi Ota; Hiroki Akamatsu; Hiroshi Tamagawa; Hirotaka Shoji; Hiroyuki Egi; Hisahiro Matsubara; Hisanori Miki; Hossam Elfeki; Hung-Hsin Lin; Iacopo Giani; Iban Caravaca-García; Ichihiro Takemasa;

Imerio Angriman; Ionut Negoi; Irina Volkova; Iris Russo; Irmgard E. Kronberger; Iskander Shageev; Ishak Aydin; Ismael Mora Guzmán; Ivana Novak; Izzo Giuliano; Jacob Rachmuth; James Chi-Yong Ngu; James Glasbey; Jan Stoot; Jan Žatecký; Jarno Melenhorst; JBC Van Der Wal; Jeroen Leijtens; Jessica Bogach; Jessie Elliott; JHW De Wilt; Jiagang Han; Jian Cui; Jiaqi Liu; Jim Khan; Jimmy Panji Wirawan; Jinji Zhang; Joel Davis Osorio Manyari; Johannes Doerner; Jonathan Bock; Joop Konsten; Jorge Mario Castro; Jorge Pérez Grobas; José Pereira Pinto; Jovan Juloski; Juan Luis Blas Laina; Juan José Solórzano; Juan Ramón Gómez López; Jun Li; Jun Watanabe; Jung-Myun Kwak; Junichi Hasegawa; Junichiro Hiro; K. Sergey; Kai Zhang; Kaoru Nagahori; Karla Martinez; Katsuji Tokuhara; Katsuki Danno; Kay Uehara; Kazuhiko Yoshimatsu; Kazuhisa Ehara; Kazuki Ueda; Kazuyoshi Suda; Kazuyuki Yamamoto; Kei Ishimaru; Kei Kimura; Keiji Hirata; Kemal Deen; Ken Imaizumi; Jenji Yamada; Kenta Tanakura; Khaled Rida; Kiichi Sugimoto; Kitani Kotaro; Kiwisure Shi; Koji Okabayashi; Koya Hida; Kozo Kataoka; Kumiko Hongo; Kunkun Xia; Larissa Tseng; Lars Reime; Laura Lorenzon; Laura Muiños Ruano; Leandro Siragusa; Lei Zhou; Lindsey De Nes; Lorena Brandariz; Lorenzo Morini; Lorenzo Petagna; Lorenzo Ripamonti; Lourdes Hernandez Martinez; Luca Pio; Luca Sacco; Lucia Carvalho; Luigi Zorcolo; Luis Eduardo Pérez-Sánchez; Luis Humberto Reyes Esparza; Luis Tallon Aguilar; Madeleine Garner; Maki Sugimoto; Makoto Nagashima; Manabu Shiozawa; Manfredelli Simone; Manuel Ferrer-Marquez; Marcia Carvalho; Marco Alifano; Marco Arganini; Marco Calussi; Marco Catarci; Marco Ettore Allaix; Marco Forlin; Marco Milone; Marco Paci; Marzia Franceschilli; Margot Fodor; Maria Antípova; Maria Beltran Martos; Maria Carmela Giuffrida; María Diez Tabernilla; María José Alcaide Quirós; Maria Lemma; Maria Luisa Reyes Diaz Correo; Maria Małowiecka; Maria Paola Bellomo; Maria Ramos Fernandez; María Socias; Mariam Rizk; Mariani Aurora;

Mariano Alvarez Antolinez; Marijana Ninkovic; Mario Giuffrida; Marjolein MN Leeuwenburgh; Marnix AJ De Roos; Marta Cañón Lara; Marta Clement Agustin; Marta Cuadrado; Marta Pascual; Martina Lemmerer; Carlos R; Masa Okamoto; Masaaki Miyo; Masafumi Inomata; Masakazu Ikenaga; Masaki Tsujie; Masamichi Yasuno; Masanori Kotake; Masanori Sato; Masayoshi Yasui; Matteo Lavazza; Matteo Rottoli; Matteo Zuin; Mauricio Zuluaga; Maurizio Cervellera; Maurizio Cesari; Maurizio Zizzo; Mauro Garino; Mauro Ghirardi; Mauro Montuori; Mauro Podda; Mauro Santarelli; Mehmet Ali Koc; Melissa Baini; Michael De Cillia; Michela Campanelli; Michele De Rosa; Michele Manigrasso; Michele Zuolo; Miguel F. Cunha; Mihaela Misca; Mihail Slavchev; Mikhail Danilov; Mikhail Shigaev; Milou Martens; Minako Kobayashi; Mingyang Ren; Mitsuru Ishizuka; Mohammed Mustafa Hassan; Mohammad Siblini; Mohamed Sahloul; Mohammad Reza Keramati; Monish Karunakaran; Moritz Markel; Mudassar Majeed; Muhammad Umar Younis; Muhammed Ikbal Akin; Munazza Laraibe; Murat Derebey; Murat Kendirci; Mutsumi Fukunaga; Nagahide Matsubara; Narce Eunice Cruz Ordaz; Narimantas Evaldas Samalavicius; Nattawut Keeratibharat; Nicola de Angelis; Nicolae Gica; Nicolás Maria Mariani; Nicolò Ramino; Nicolò Falco; Neil Smart; Niels De Korte; Niels FM Kok; Nigel B Jamieson; Nikolay Aberyasev; Nikolay Bruklich; Nobuki Ichikawa; Norikatsu Miyoshi; Norma De Palma; Nuno Figueiredo; Nuria Ortega Torrecilla; Oleg G. Dybov; Oleg Yudin; Ollende Crepin; Oscar Gomez; Ozlem Zeliha Sert; Pablo Lozano Lominchar; Pablo Menéndez; Paola De Nardi; Patricia Tejedor; Patrick Jordan; Patrick Tan; Patrizia Marsanic; Pechnikova Natalya; Pedro Parra Baños; Pere Rebas; Peter M Neary; Pieter Tanis; Piero Giustacchini; Pietro Anoldo; Pilar Concejo; Pin Cao; Pramodh Chandrasinghe; Prasad Abeyratne; Quan Wang; R.J. Klicks; R.Mukai; Rafael Ferrer Riquelme; Raffaele De Luca; Raffaele Galli; Raffaele Giancesini; Rajesh Gianchandani

Moorjani; Rajkiran K Deshpande; Ramon Gorter; Raquel Leon Ledesma; Rategov Ruslan; Raunaq Chhabra; Reena Talreja-Pelaez; Rei Suzuki; Riccardo Balestri; Riccardo Rosati; Rim Kiblawi; Rita Martins; Roberta Angelico; Roberta Tutino; Roberto Persiani; Roberto Pollastri; Rocío González López; Rodrigo Oliva Perez; Roel Hompes; Roman Lukanin; Roser Termes Serra R; Rossella Brunaccino; Ryota Nakanishi; Samuel Stefan; Sandra Paola Sánchez Hernández; Sara Di Carlo; Sara Ingallinella; Satoru Domoto; Satoshi Ikeda; Saulius Mikalauskas; Seon Hahn Kim; Serena Mantova; Severius Barbuta; Shaotang Li; Shigeki Yamaguchi; Shigeru Yamagishi; Shigenori Homma; Shingo Tsujinaka; Shinichi Yoshioka; Shinichiro Mori; Shirish Tewari; Shlomi Rayman; Sho Horiuchi; Shuichiro Matoba; Shunji Morita; Sibel Yaman; Silvia Vigna; Silvio Testa; Simon Ng; Simona Deidda; Simone Cicconi; Simone Di Maria; Simone Sibio; Siyar Ersoz; Sofija Pejкова; Soliman Altarifi; Songbing He; Songphol Malakorn; Sosef Meindert; Sosuke Sumikawa; Stavan Parmar; Stefan Uranitsch; Stefano D'ugo; Stefano Giuliani; Stéphanie Breukink; Suk-Hwan Lee; Taishi Hata; Takahisa Ishikawa; Takashi Akiyoshi; Takashi Azuma; Takaya Kobatake; Takayuki Fukuzaki; Takeshi Aiyama; Takeshi Yamada; Tatiana Garmanova; Tatiana Gómez-Sánchez; Tatsuro Yamaguchi; Teresa De Jesús Flores; Teruyuki Usub; Tetsuhiro Tsuruma; Tetsuichiro Shimizu; Tihomir Georgiev Hristov; Ting Van Loon; Tohru Funakoshi; Tommaso Maria Manzia; Tomomichi Kiyomatsu; Tomonari Katayama; Tomonori Akagi; Tsunekazu Mizushima; Uemura Kazuhito; Ugo Elmore; Ugo Grossi; Vadim A. Truchalev; Valentina Sosa Rodríguez; Valentina Testa; Valeria Tonini; Valerio Celentano; Valery M.Nekoval; Vanessa Bettencourt; Vasif Mammadov; Verónica Alejandra Galue Leyva; Veronica Georgina Ortega Mariscal; Victor Edmond Seid; Victor Klemann; Víctor Turrado-Rodríguez; Vincenzo Papagni; Vincenzo Vento; Vincent Frering; Vincenzo Vigorita; Vitaliva V. Petrove; Vladimir Lyadov; Wei Fu; Wei Mi; Woon Kyung Jeong;

Wouter KG Leclercq; Xavier De Sousa;  
Xing Zhao; Xinxiang Li; Xinxin Wang;  
Xuanhua Yang; Xuelei Zhang; Ya'nan  
Zhen; Yan Dong; Yana Erushevich;  
Yasumasa Takii; Yasuo Sumi; Yeray  
Trujillo Loli; Yosef Lishtzinsky Yifat;

Yoshifumi Shimada; Yoshihiro Nabeya;  
Yoshihito Ide; Yuan Wu; Yuichiro  
Tsukada; Yuji Miyamoto; Yuji Toiyama;  
Yujiro Fujie; Yuka Kaneko; Yukako  
Mokutani; Yuki Fujii; Yukihide Kane-  
mitsu; Yulia Medkova; Yulong Chen;

Yurema Gonzalez Ruiz; Yusuke Kin-  
ugasa; Zacaria Sow; Zeeshan Razzaq;  
Zejun Wang; Zheng Liu; Zhenguo Han;  
Zihui Tai; Zhiyong Lai; Zi Qin Ng;  
Zilvinas Dambrauskas.
